# Supplementary material for: SPMLMI: predicting lncRNA–miRNA interactions in humans using a structural perturbation method
Source: PeerJ journal article supplement (doi:10.7717/peerj.11426), 2021-05-19
Supplement: Supplementary_File_S1.pdf [file Supplementary_File_S1.pdf]

# Supplementary\_File\_S1

## 1 Structural consistency

The concept of structural consistency was first proposed by Lü et al., which can be used to quantify the link predictability of complex networks (Lü et al. 2015; Zeng et al. 2018). They define it as the consistency of network structure features before and after random removal of partial links. In this study, we applied this method to weighted bilayer networks; viz. weighted lncRNA–miRNA bilayer network  $A$ .

We use graph  $G = (V, E, W)$  to represent the weighted lncRNA–miRNA bilayer network.  $V$  and  $E$  are the sets of nodes (include both lncRNA and miRNA nodes) and edges, respectively; and  $W$  is set of weights. We select a small part of the links to compose a perturbation set  $\Delta E$ , while the rest of the links are defined as  $E^R$ .  $\Delta A$  and  $A^R$  represent the corresponding weighted adjacency matrix, respectively; and  $A = A^R + \Delta A$ . Obviously,  $A^R$  is a real symmetric matrix; therefore, it can be diagonalized as follows.

$$A^R = \sum_{k=1}^N \lambda_k x_k x_k^T, \quad (2)$$

where  $\lambda_k$  are the eigenvalues for  $A^R$  and  $x_k$  are the corresponding orthogonal and normalized eigenvectors.

Using  $\Delta E$  as the perturbation set, we obtain a perturbed matrix by first-order approximation. First-order approximation allows the eigenvalues to change but keeps the eigenvectors constant. Two cases are considered. First, consider the non-degenerated case without any repeated eigenvalues. After perturbation, the eigenvalue  $\lambda_k$  is adjusted to  $\lambda_k + \Delta\lambda_k$ , and the corresponding eigenvector is adjusted to  $x_k + \Delta x_k$ . By multiplying the eigenfunction, we have

$$(A^R + \Delta A)(x_k + \Delta x_k) = (\lambda_k + \Delta\lambda_k)(x_k + \Delta x_k). \quad (3)$$

By  $x_k^T$  and neglecting the second-order terms  $x_k^T \Delta A \Delta x_k$  and  $\Delta\lambda_k x_k^T \Delta x_k$ , we obtain

$$\Delta\lambda_k \approx \frac{x_k^T \Delta A x_k}{x_k^T x_k}. \quad (4)$$

Using the perturbed eigenvalues while keeping eigenvectors unchanged, the perturbed matrix can be obtained,

$$A' = \sum_{k=1}^N (\lambda_k + \Delta\lambda_k) x_k x_k^T, \quad (5)$$

which can be considered a linear approximation of the given network  $A$  if the expansion is based on  $A^R$ .

Next, considering the adjacency matrix contains repeated eigenvalues. If  $\lambda_{ki}$  is eigenvalues, the index  $i$  denotes  $M$  related eigenvectors of the same eigenvalues and the index  $k$  denotes different eigenvalues. It is given that any linear combination of eigenvectors belonging to the same eigenvalue is still an eigenvector. After adding a perturbation into the network, we choose the degenerate eigenvalues, which can be changed successively into the perturbed nondegenerate eigenvalues. If we define the chosen eigenvectors to be  $x'_{ki} = \sum_{j=1}^M \beta_{kj} x_{kj}$ , the eigenfunction becomes

$$(A^R + \Delta A)x'_{ki} = (\lambda_{ki} + \Delta\lambda'_{ki})x'_{ki}, \quad (6)$$

giving us

$$\Delta\lambda'_{ki} \sum_{j=1}^M \beta_{kj} x_{kj} = \sum_{j=1}^M \beta_{kj} \Delta A x_{kj}, \quad (7)$$

for any  $n = 1 \cdots M$ , left multiplying Equation (7) by  $x'_{kn}$ , we obtain

$$\Delta\lambda'_{ki}\beta_{kn} = \sum_{j=1}^M \beta_{kj}x_{kn}^T \Delta A x_{kj}. \quad (8)$$

Written in matrix form, Equation (8) becomes

$$WB_k = \Delta\lambda'_k B_k, \quad (9)$$

where  $W_{ni} = x_{kn}^T \Delta A x_{ki}$ , which is a  $M \times M$  matrix, and  $B_k$  is the column vector of  $\beta_{ki}$ . Then, according to eigenfunction (9), we obtain  $\Delta\lambda'_k$  and  $B_k$ ; the perturbed adjacency matrix  $A'$  is obtained by simply replacing  $x_k$  and  $\Delta\lambda_k$  in Equation (5) with  $x'_k$  and  $\Delta\lambda'_k$ .

Matrix eigenvectors can reflect the network structural features. If the eigenvectors of matrix  $A'$  and matrix  $A$  are nearly the same, it indicates that the perturbation set does not significantly change the structural features. In other words, the network is of high structural consistency. All unobserved links (including perturbed links) are ranked in descending order according to their corresponding scores in perturbed matrix  $A'$ . Denote the set of top- $L$  links as  $E^L$ , where  $L = |\Delta E|$ . Structural consistency  $\sigma_c$  is defined as the ratio of shared links between  $\Delta E$  and  $E^L$  to  $L$ , follow as

$$\sigma_c = \frac{|E^L \cap \Delta E|}{L}. \quad (10)$$

Figure S1 shows how to calculate the structural consistency  $\sigma_c$  of a toy example. The left figure shows the adjacency matrix  $A$ , where the number in each square is the corresponding value of the matrix element. The second figure represents the matrix  $A^R$ , which is obtained by randomly removing a fraction of the observed links. The removed links, namely, (1,4), (3,8), (5,10), (7,8), (7,10) and (9,10), constitute the perturbation set  $\Delta E$ . Obviously,  $L = |\Delta E| = 6$ . The right figure is the perturbed matrix  $A'$ . By ranking the unobserved links in  $A^R$  according to their corresponding values in  $A'$ , we obtain the top- $L$  links in  $E^L$  as (1,4), (6,8), (3,8), (5,10), (3,9) and (7,8). Therefore, there are four shared links between  $\Delta E$  and  $E^L$ ,  $\sigma_c = 4/6 \approx 0.67$ .

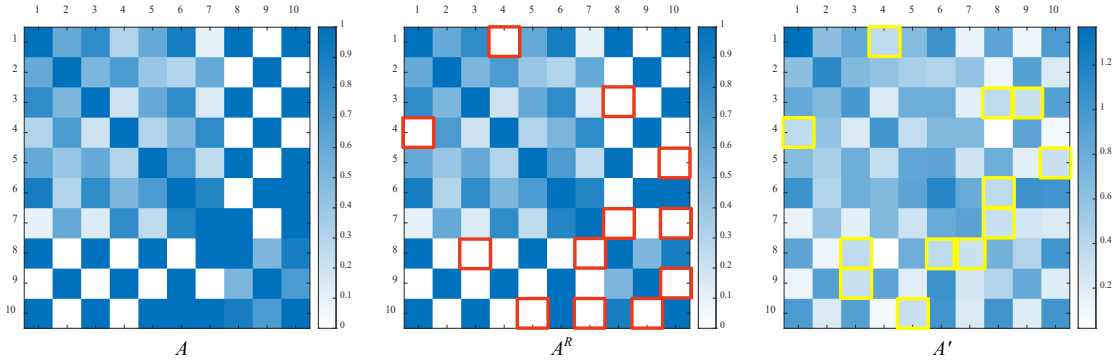

Figure S1. Toy example of  $\sigma_c$  calculation.

## 2 Structural perturbation method for lncRNA–miRNA interaction prediction

Generally, the link prediction problem of a network is how to estimate the probability of the existence of unobserved links according to known topological information. The network structure perturbation involved in the structure consistency calculation process can be used to predict the missing links (Lü et al., 2015).

For the lncRNA–miRNA bilayer network  $A$ , taking 5-fold cross-validation as an example, the observed links in the original adjacency matrix ( $LMnet$ ) are randomly divided into 5 equal sized subsets. Of these 5 subsets, one is selected as the probe set, and the others, together with  $LSnet$  and  $MSnet$ , as the training set. Next, we randomly remove a fraction of links from training sets to constitute the

perturbation set. The perturbation matrix can be calculated as  $A'$ , see the [section 1](#) for details. The final prediction matrix  $\hat{A}'$  is obtained by averaging over  $t$  independent selections of the perturbation set. In this way, the elements in prediction matrix  $\hat{A}'$  can be regarded as a score between a pair of nodes of the bilayer network  $A$ . The scores in  $\hat{A}'$  determine the extent of all unobserved lncRNA–miRNA interactions, and we assume that the higher the score, the more likely the potential interaction will be.

### 3 References

- Lü L, Pan L, Zhou T, Zhang YC, and Stanley HE. 2015. Toward link predictability of complex networks. *Proc Natl Acad Sci U S A* 112:2325-2330. [10.1073/pnas.1424644112](https://doi.org/10.1073/pnas.1424644112)
- Zeng X, Liu L, Lu L, and Zou Q. 2018. Prediction of potential disease-associated microRNAs using structural perturbation method. *Bioinformatics* 34:2425-2432. [10.1093/bioinformatics/bty112](https://doi.org/10.1093/bioinformatics/bty112)
